# Supplementary material
Source: PubMed Central journal article supplement (PMC7958183)

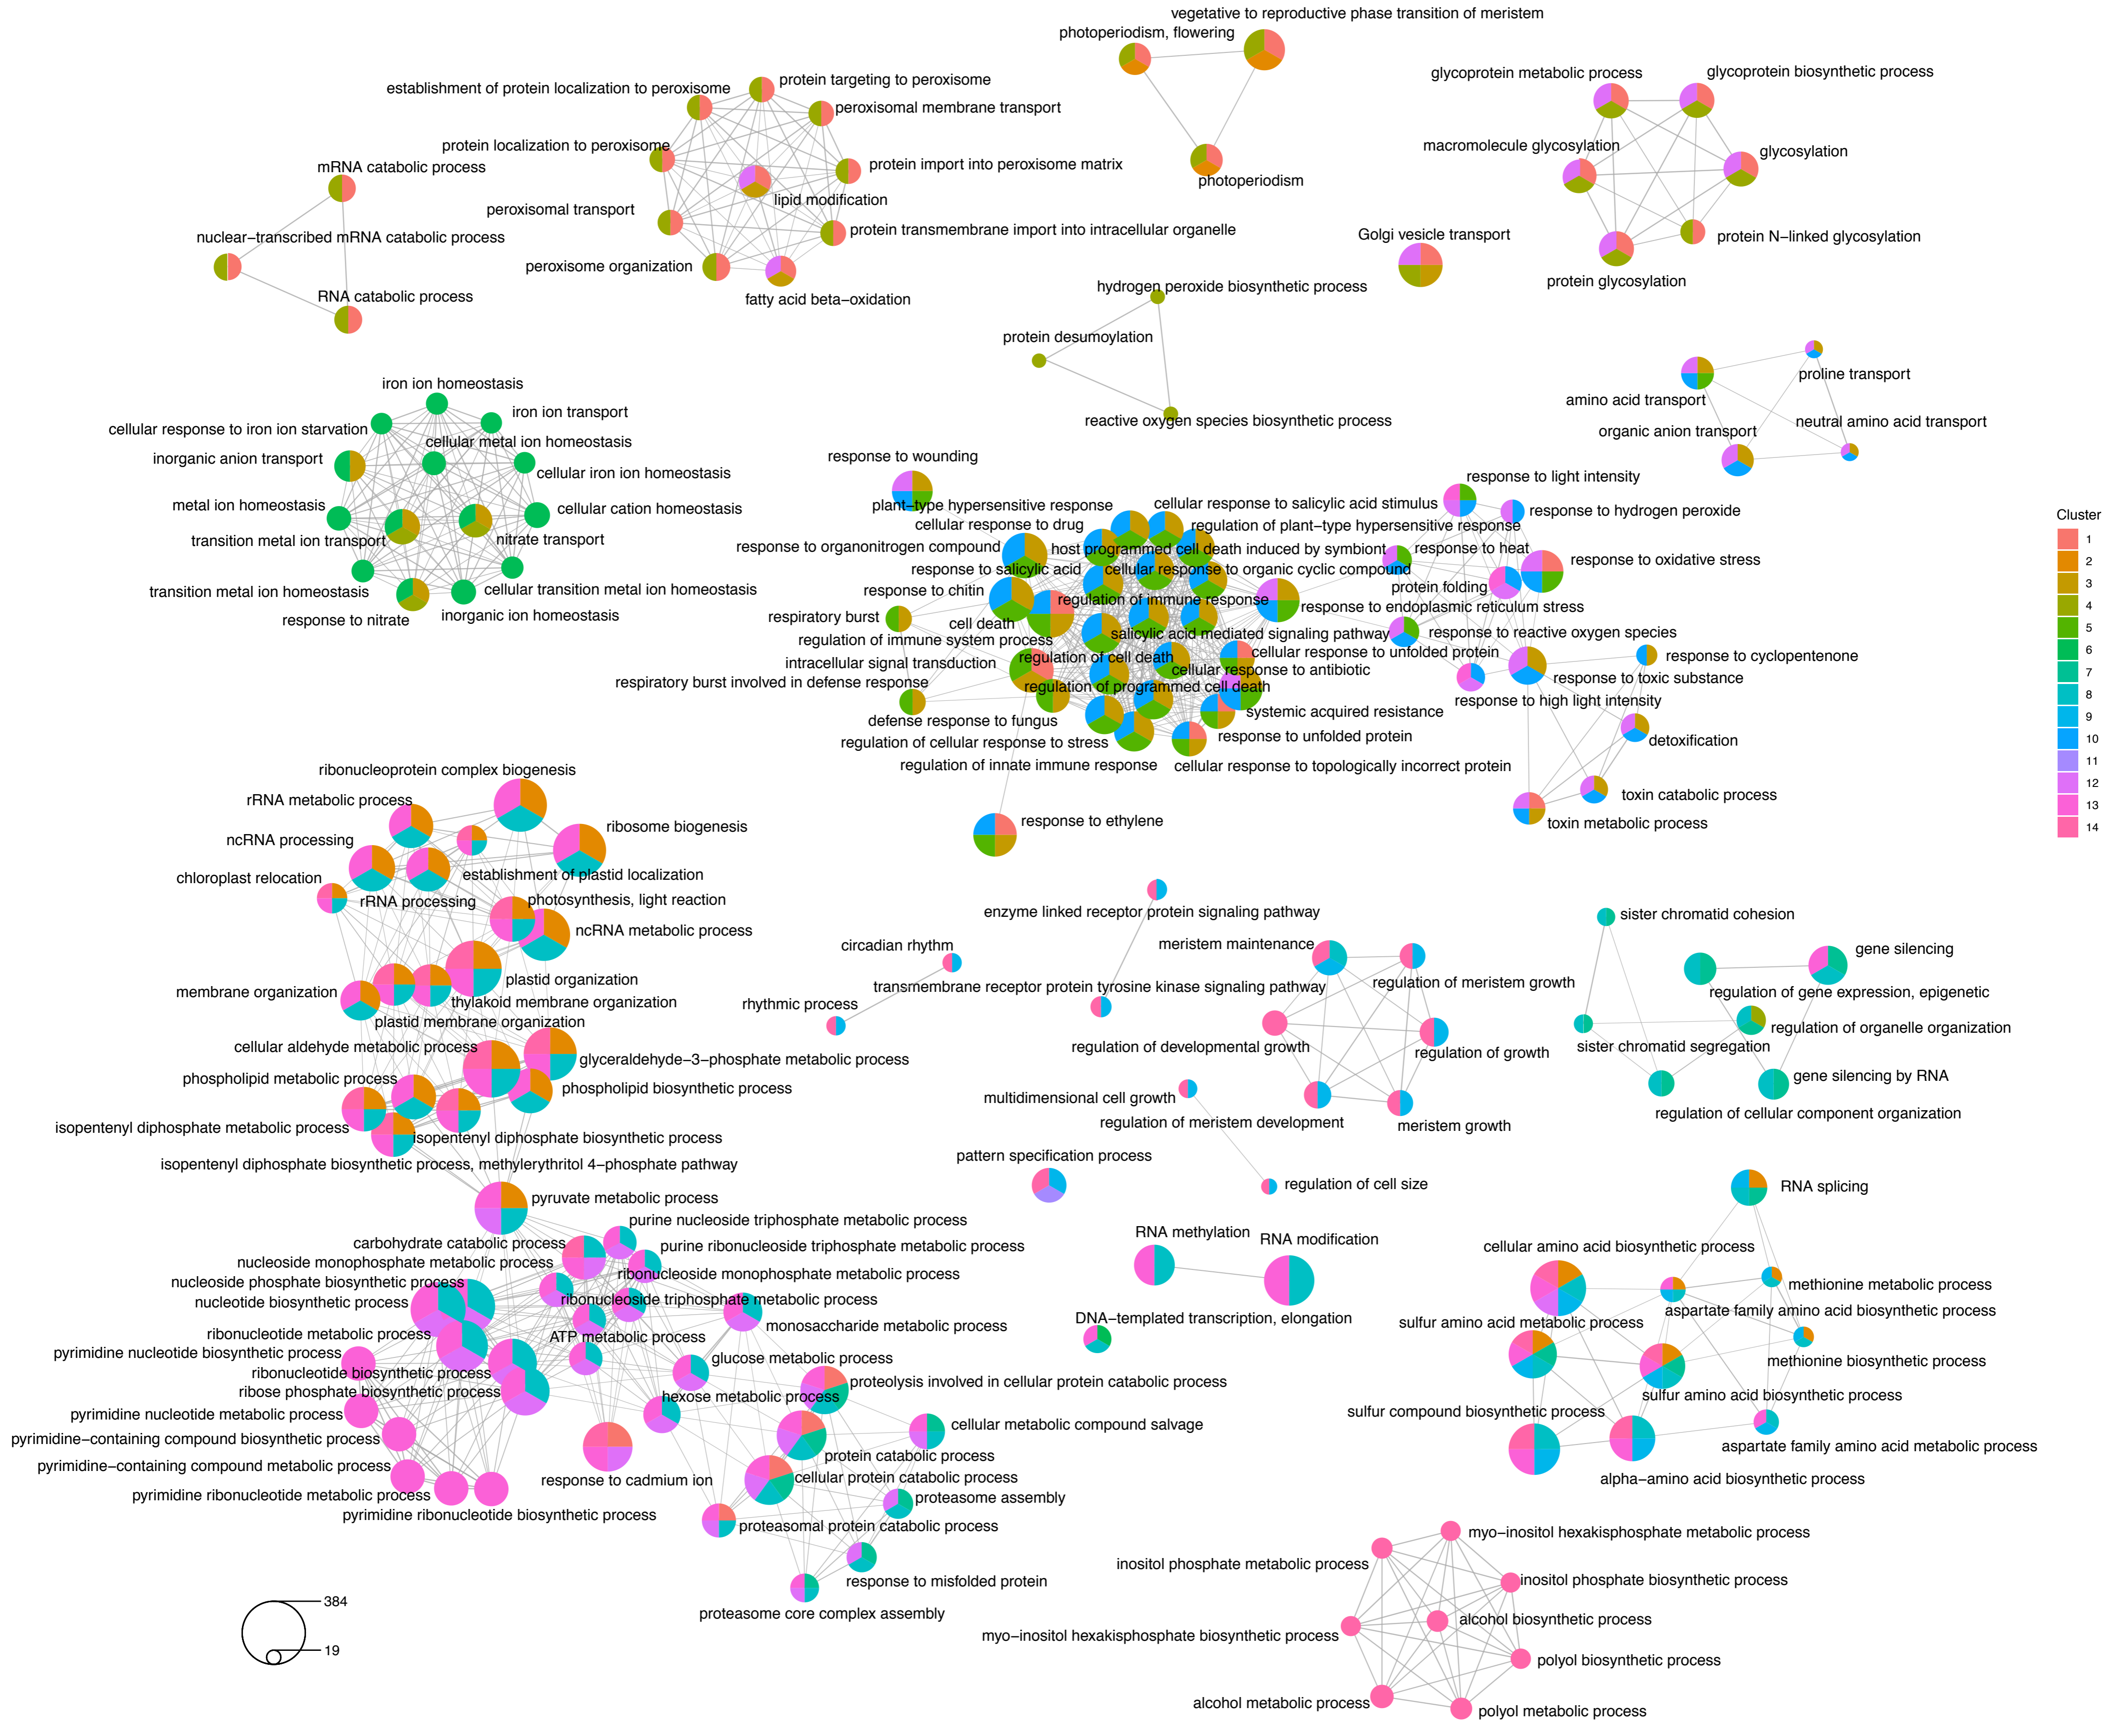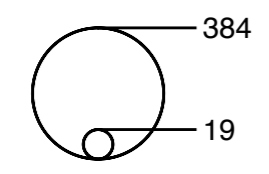

Supplement: pnas.2020646118.sd04.pdf [file pnas.2020646118.sd04.pdf]
